# Supplementary material
Source: PubMed Central journal article supplement (PMC10601744)
Supplement: jb.00064-23-s0001.pdf [file jb.00064-23-s0001.pdf]

## Supplemental Figures

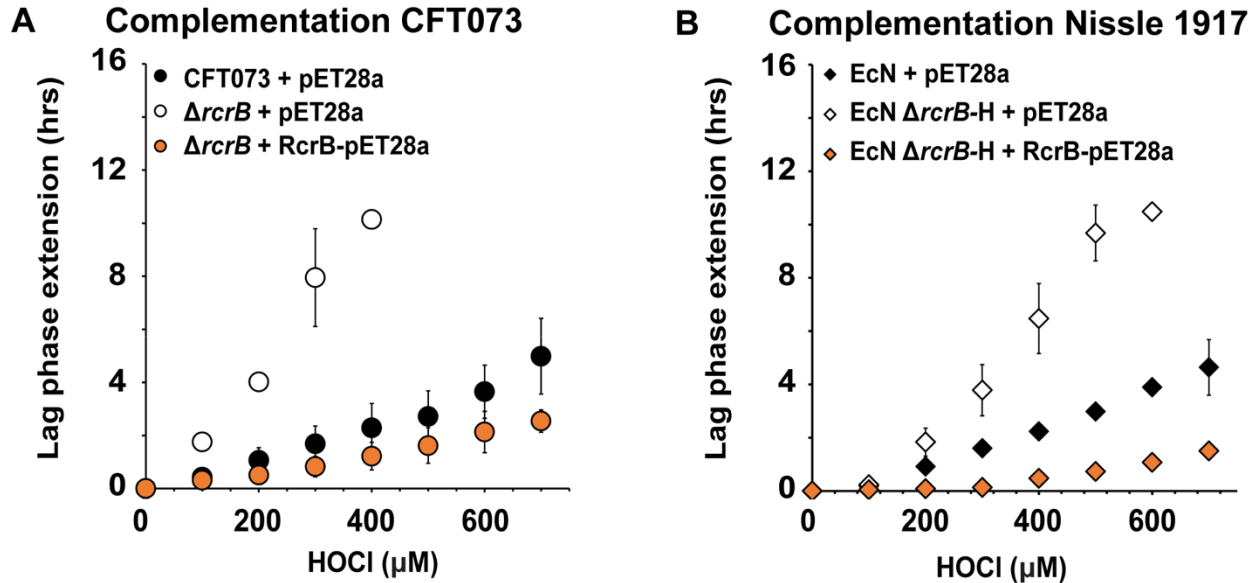

**Supplementary FIG S1. Recombinant expression of CFT073 RcrB complements the HOCl sensitivity phenotypes of *E. coli* strains deficient in *rcrB* or its homolog.** Growth phenotype analyses of the UPEC strain CFT073 and Nissle 1 917 carrying pET28a or *rcrB*-pET28a in the presence and absence of *rcrB* were performed in MOPSG media in the presence of the indicated HOCl concentrations. HOCl-mediated LPE was calculated for each strain (see Materials and Methods for a detailed protocol). Recombinant expression of RcrB in **(A)** CFT073 and  $\Delta rcrB$ , and **(B)** *E. coli* Nissle 1917 and  $\Delta rcrB$ -homolog ( $\Delta rcrB$ -H) resulted in full complementation restoring HOCl resistance comparable to the corresponding wildtype strains CFT073 and EcN, respectively ( $n = 4$ ,  $\pm S.D.$ ).

**A. Late log phase cultures with different start OD<sub>600nm</sub>**

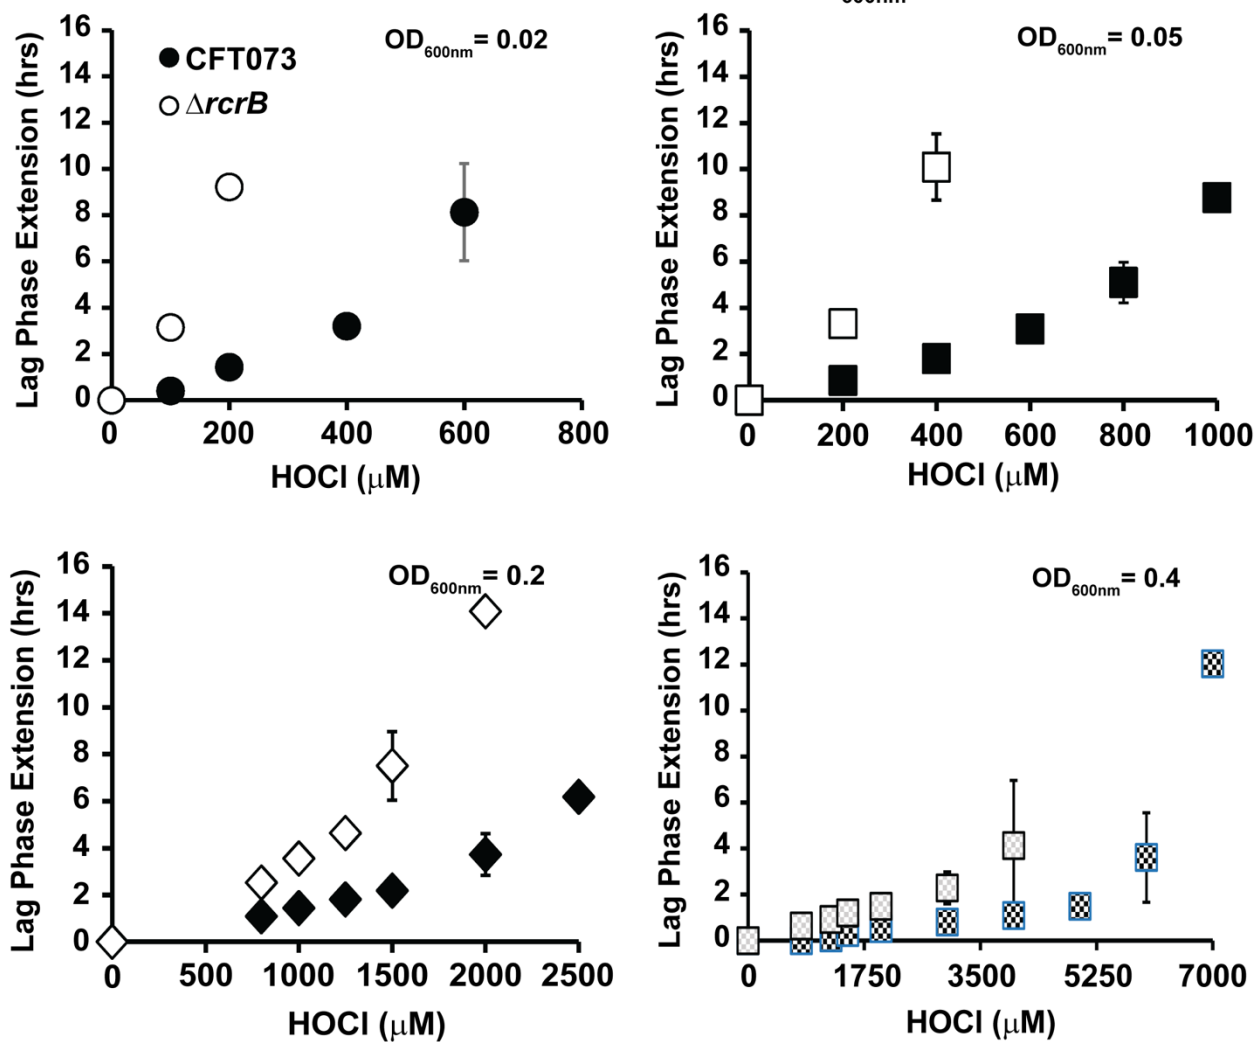

**B. Exponential cultures with different start OD<sub>600nm</sub>**

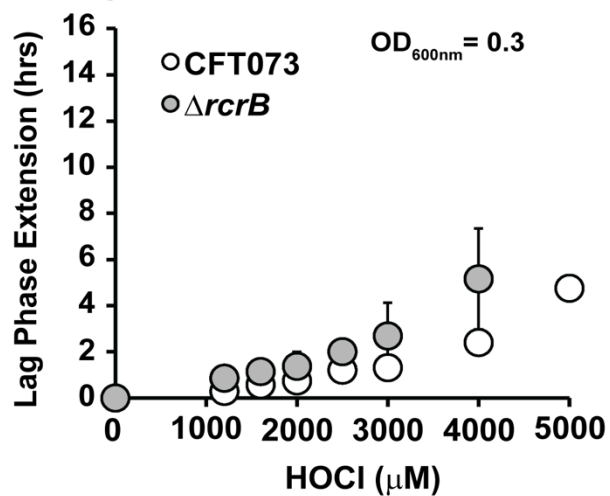

**Supplementary FIG S2. RcrB plays an important role for UPEC's HOCl resistance under various growth conditions.** Growth phenotype analyses of UPEC strains CFT073 and  $\Delta rcrB$  were performed in MOPSG media in the presence of the indicated HOCl concentrations. HOCl-mediated LPE was calculated for each strain (see Materials and Methods for a detailed protocol). **(A) Late log cultures:** overnight cultures of CFT073 (black fillings) and  $\Delta rcrB$  (white fillings) were diluted 25-fold into fresh MOPSG and grown until they reached late log / early stationary phase ( $OD_{600} \sim 2$ ) before they were diluted again to the indicated start  $OD_{600}$  and cultivated in the presence of the indicated HOCl concentrations; ( $n = 3-4, \pm S.D.$ ). **(B) Exponential cultures:** overnight cultures of CFT073 (white circles) and  $\Delta rcrB$  (grey circles) were diluted into fresh MOPSG to an  $OD_{600} = 0.01$  and grown until they reached an  $OD_{600} = 0.3$  before they were split up and cultivated in the presence of the indicated HOCl concentrations; ( $n = 3-4, \pm S.D.$ ).

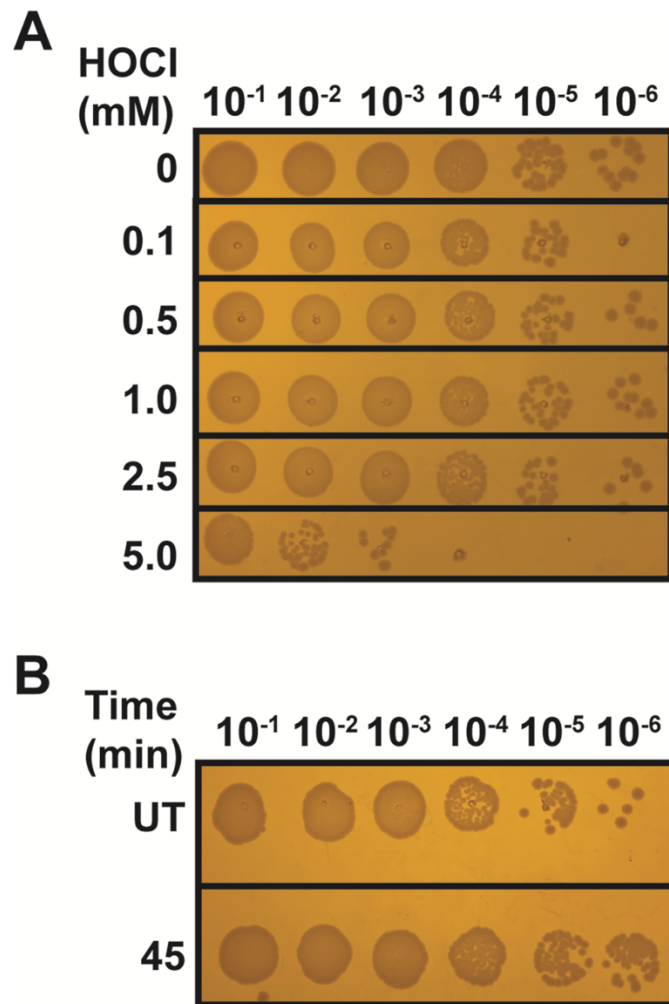

**Supplementary FIG S3. Survival assays performed in conjunction with gene expression analyses.** UPEC strain CFT073 was grown in MOPSG to mid-log phase ( $OD_{600} \sim 0.5-0.55$ ) before it was incubated with the indicated HOCl concentrations for the indicated time. Remaining HOCl was quenched with 5-fold excess of thiosulfate after **(A)** 15 min and **(B)** 45 min of exposure to 1 mM HOCl, cells serially diluted and spot-titered onto LB agar plates for overnight incubation at 37 °C. The experiments were repeated at least three independent times.

**A HOCl susceptibility in growth assay**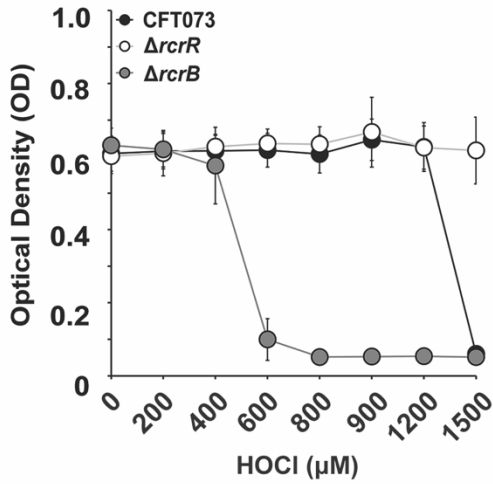**B NCT susceptibility in growth assay**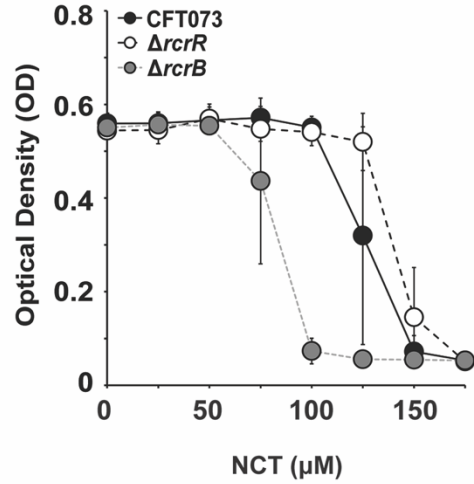**C Gly-Cl susceptibility in LPE assay**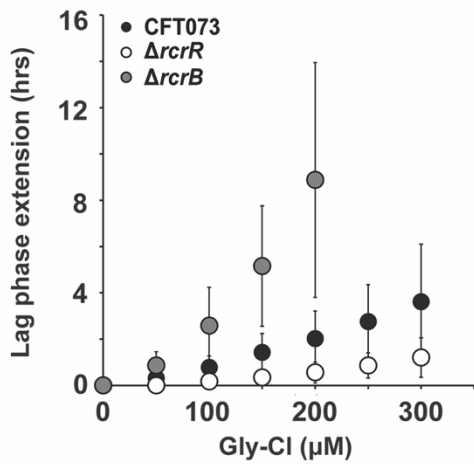**D HOSCN susceptibility in LPE assay**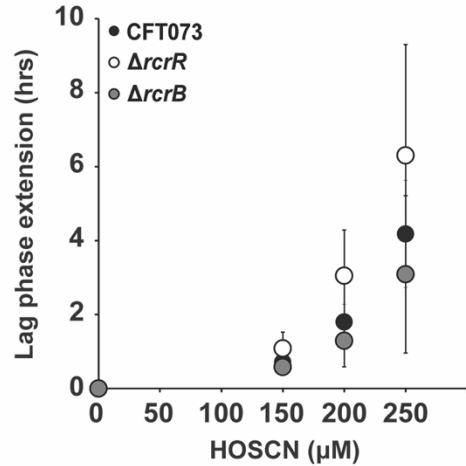**E H<sub>2</sub>O<sub>2</sub> susceptibility in growth assay**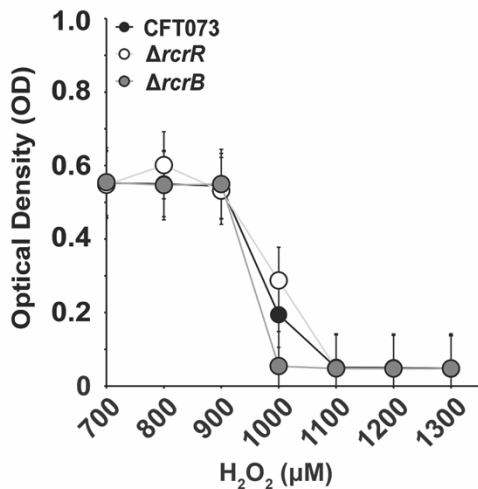

**Supplementary FIG S4. The RcrR regulon protects from HOCl stress and its byproducts but not from H<sub>2</sub>O<sub>2</sub> and HOSCN.** Growth phenotype analyses of UPEC strains CFT073,  $\Delta rcrB$ , and  $\Delta rcrR$  were performed in MOPSG media in the presence of the indicated stressor concentrations. LPE were calculated for each strain (see Materials and Methods for a detailed protocol). The absence of *rcrB* in CFT073 caused a reduction in HOCl resistance, while constitutive RcrB expression (i.e.  $\Delta rcrR$ ) caused increased resistance to all stressors except HOSCN and H<sub>2</sub>O<sub>2</sub>, ( $n = 4-6, \pm S.D.$ ).

**A HOCl susceptibility in growth assay**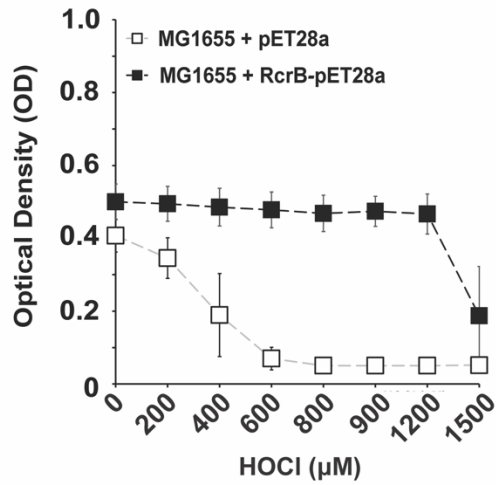**B NCT susceptibility in growth assay**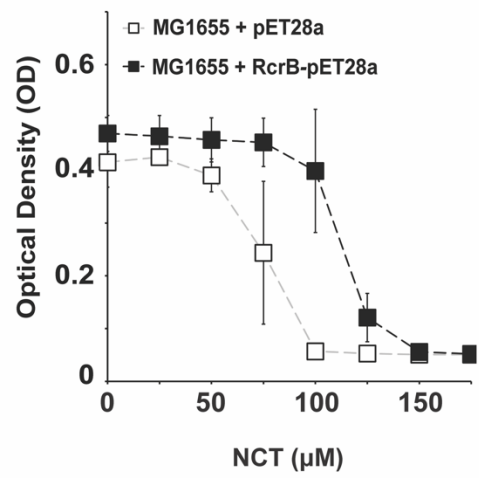**C Gly-Cl susceptibility in LPE assay**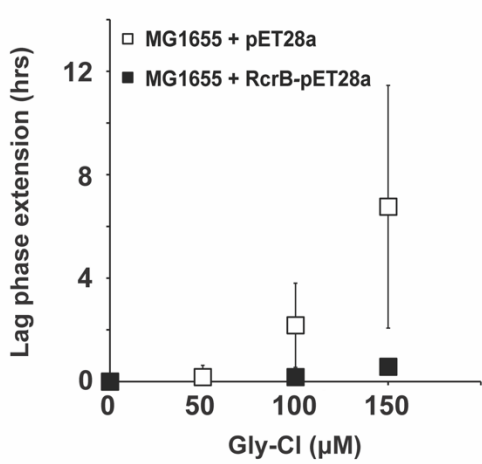**D HOSCN susceptibility in LPE assay**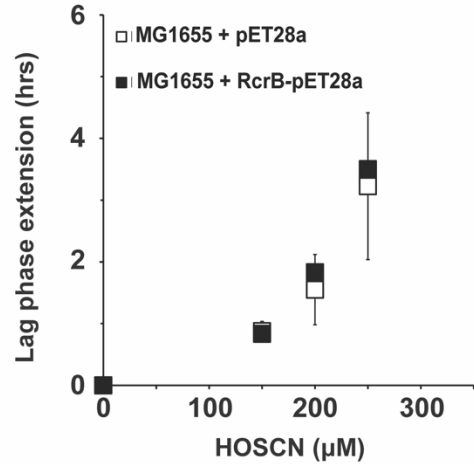**E H<sub>2</sub>O<sub>2</sub> susceptibility in growth assay**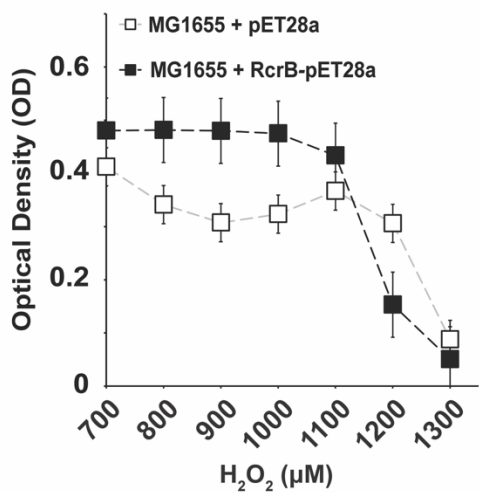

**Supplementary FIG S5. The RcrR regulon protects from HOCl stress and its byproducts but not from H<sub>2</sub>O<sub>2</sub> and HOSCN.** Growth phenotype analyses of the K-12 *E. coli* strain MG1655 carrying pET28a or *rcrB*-pET28a, respectively, were performed in MOPSG media in the presence of the indicated stressor concentrations. LPE were calculated for each strain (see Materials and Methods for a detailed protocol). Recombinant expression of RcrB in MG1655 resulted in an increased resistance to all stressors except for HOSCN and H<sub>2</sub>O<sub>2</sub> compared to the empty vector control, ( $n = 4-6, \pm S.D.$ ).



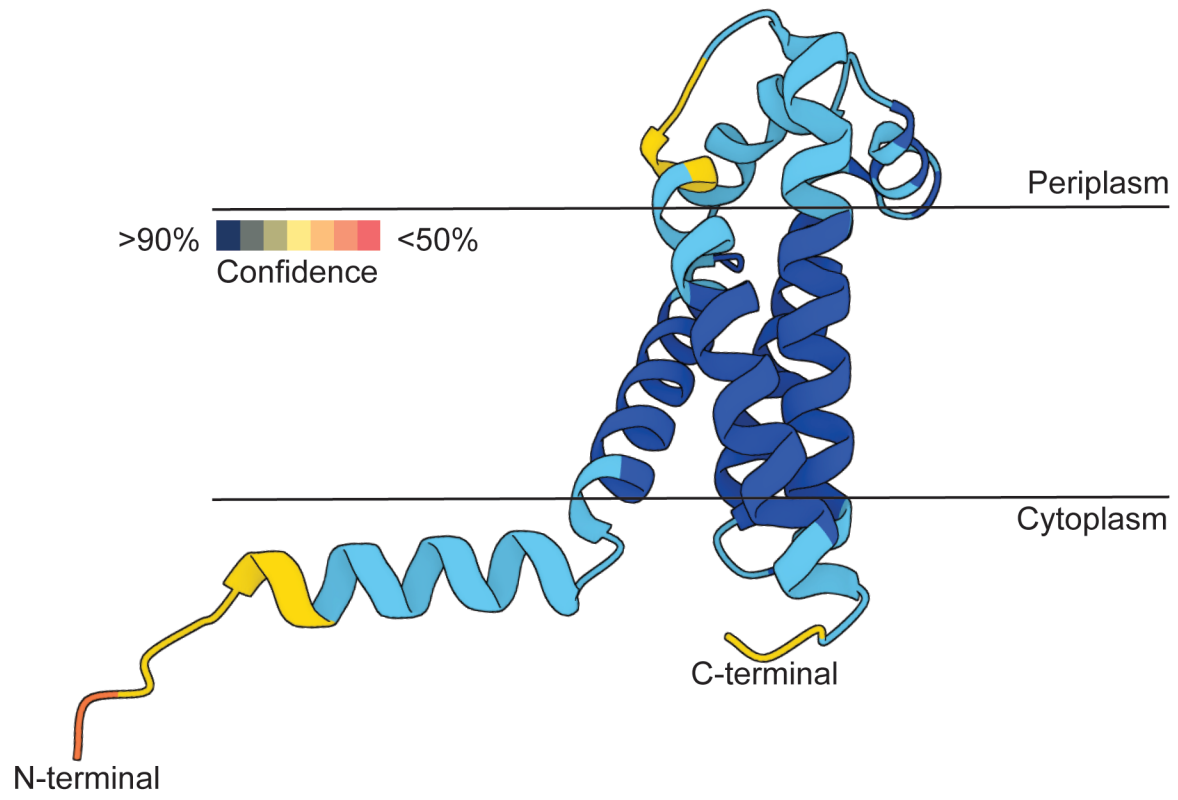

**Supplementary FIG S6. The predicted alpha-fold structure of RcrB.**
